# Supplementary material for: AMBRA1 promotes dsRNA- and virus-induced apoptosis through interacting with and stabilizing MAVS
Source: Oxford University Press journal article supplement (doi:10.1242/jcs.258910), 2021-12-03
Supplement: jcs258910supp.pdf [file jcs258910supp.pdf]

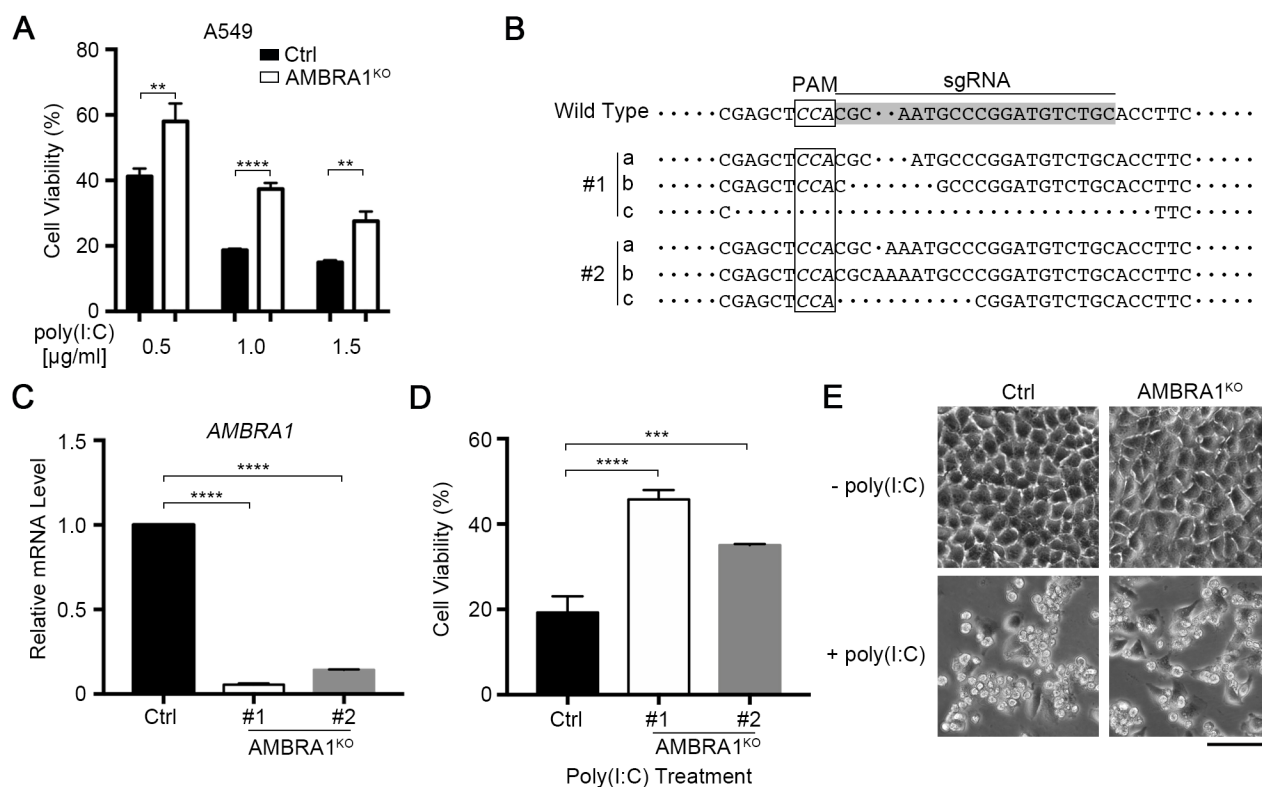

**Fig. S1. AMBRA1 promotes dsRNA-induced cell death.** (A) Cell viabilities. The control and AMBRA1<sup>KO</sup> cells were transfected with 0.5, 1, and 1.5 μg/ml poly(I:C). At 24 h post-transfection, cell viabilities were measured by CCK8 assay. P values were calculated by unpaired, two-tailed student's test; \*\*\*\*p < 0.0001, \*\*p < 0.01. (B) Sequences of two HeLa AMBRA1<sup>KO</sup> cell clones. Genomic DNA was extracted and the region surrounding sgRNA targeting sequences was amplified and sequenced. (C) *AMBRA1* mRNA levels. Total RNAs of the control and two AMBRA1<sup>KO</sup> HeLa cell clones were extracted and applied for qRT-PCR. Data were presented as mean ± SD from three experiments; P values were calculated by ANOVA with Dunnett's multiple comparison test; \*\*\*\*p < 0.0001. (D) Cell viabilities. The control and two AMBRA1<sup>KO</sup> HeLa cell clones were transfected with poly(I:C). MTT assay was performed at 24 h post-transfection. Data were presented as mean ± SD from three experiments; P values were calculated by ANOVA with Dunnett's multiple comparison test; \*\*\*p < 0.001, \*\*\*\*p < 0.0001. (E) Cell images. The control and AMBRA1<sup>KO</sup> HeLa cells were transfected with poly(I:C) and then cell images were taken at 24 h post-transfection. Representative images of three independent experiments were shown. Scale bar, 50 μm.

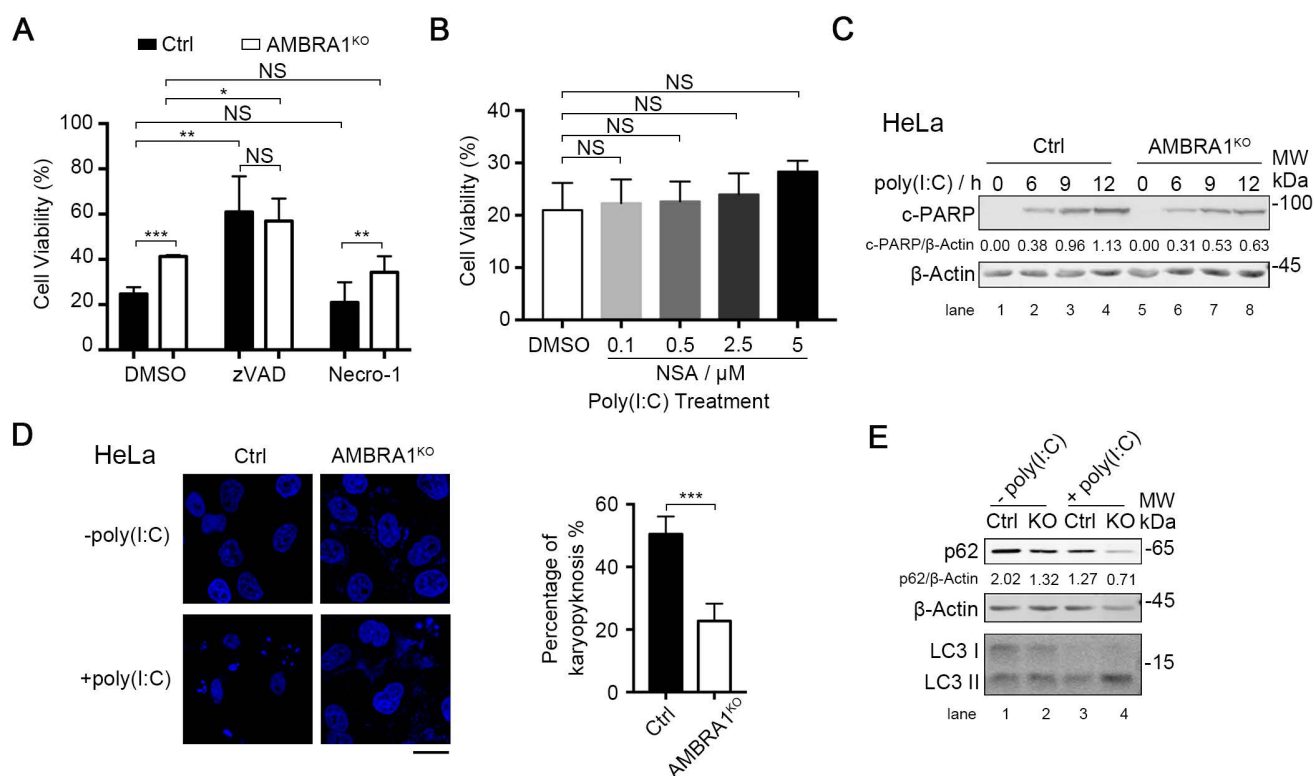

**Fig. S2. AMBRA1 promotes the dsRNA-induced apoptosis.** (A) Cell viability. The control and AMBRA1<sup>KO</sup> A549 cells were pretreated with DMSO, z-VAD(OMe)-FMK (zVAD) (50 μM) or Necrostatin-1 (Necro-1) (100 μM), followed by transfection with poly(I:C). The MTT assay was performed at 24 h post-transfection. Data were presented as mean ± SD from three experiments; P values were calculated by unpaired, two-tailed student's test; \*\*\*p < 0.001, \*\*p < 0.01, and NS, not significant, or by ANOVA with Dunnett's multiple comparison test; \*\*p < 0.01, \*p < 0.05, and NS, not significant. (B) Cell viability. A549 cells were pretreated with DMSO or of Necrosulfonamide (NSA) at indicated concentrations for 1 h, followed by transfection with poly(I:C). The MTT assay was performed at 24 h post-transfection. Data were presented as mean ± SD from three experiments; P values were calculated by ANOVA with Dunnett's multiple comparison test; NS, not significant. (C) Western blot. The control and AMBRA1<sup>KO</sup> HeLa cells were treated with poly(I:C) for indicated time and then c-PARP was measured by western blot. α-Tubulin was probed as an internal control. Representative blots of three independent experiments were presented. (D) Immunofluorescence microscopy. The control and AMBRA1<sup>KO</sup> HeLa cells were transfected with poly(I:C) for 12 h and then stained with hoechst. Cell images were taken to reveal karyopyknosis. Representative images of three independent experiments were shown. Scale bar, 20 μm. P values were calculated by unpaired, two-tailed student's test; \*\*\*p < 0.001. (E) Western blot. The control and AMBRA1<sup>KO</sup> A549 cells

were stimulated with poly(I:C). At 9 h post-transfection, the whole cell lysates were collected for detection of p62 and LC3 I/II levels.  $\beta$ -actin was probed as an internal control. Representative blots of three independent experiments were presented.

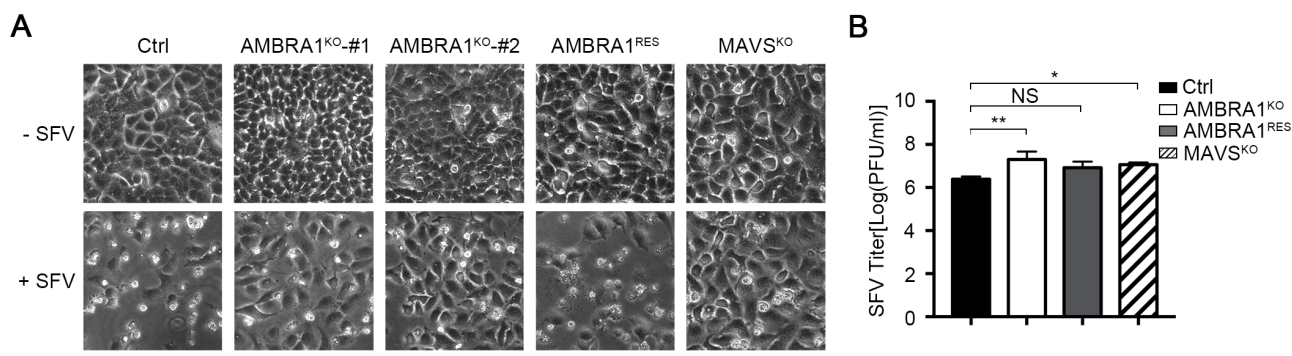

**Fig. S3. Effects of AMBRA1 or MAVS depletion on the cell death induced by SFV and viral replication.** (A) The control, AMBRA1<sup>KO</sup>, AMBRA1<sup>RES</sup>, and MAVS<sup>KO</sup> A549 cells were infected with SFV. Cell images were taken at 48 h p.i. Representative images of three independent experiments were shown. Scale bar, 50  $\mu$ m. (B) Viral titers. The supernatants were collected at 24 h p.i. for plaque assay. Data were presented as mean  $\pm$  SD from three experiments; P values were calculated by ANOVA with Dunnett's multiple comparison test; \*\*p < 0.01, \*p < 0.05, and NS, not significant.

**Table S1. Sequences of oligos used in CRISPR/Cas9 gene editing**

| Genes  | Primers      | Sequences (5'-3')    | Targeting region |
|--------|--------------|----------------------|------------------|
| AMBRA1 | sg-AMBRA1-5F | GCAGACATCCGGGCATTGCG | Exon 11          |
|        | sg-AMBRA1-3R | CGCAATGCCCGGATGTCTGC |                  |
| MAVS   | sg-MAVS-5F   | CTGTGAGCTAGTTGATCTCG | Exon 3           |
|        | sg-MAVS-3R   | CGAGATCAACTAGCTCACAG |                  |

**Table S2. Sequences of primers used in PCR amplification of gene fragments**

| <b>Genes</b>            | <b>Sequences (5'-3')</b>                                                             |
|-------------------------|--------------------------------------------------------------------------------------|
| AMBRA1-5F               | ATTTGCGGCCGCATGAAGGTTGTCCCAGAAAAGAATGC                                               |
| AMBRA1-FLAG-3R          | TTGCGGCCGCCTACTTATCGTCGTCATCCTTGTAATCACCA<br>CCACCCCTGTTCCGTGGTTCTCCCCTAG            |
| AMBRA1-NGG-5F           | TGATAGATCAAGGCACCGAGCTGCACGTAAT                                                      |
| AMBRA1-NGG-3R           | CAGACATTCGTGCATTACGTGCAGCTCG                                                         |
| AMBRA1-5F               | CGGAATTCATGAAGGTTGTCCCAGAAAAGAATGC                                                   |
| AMBRA1-HA-3R            | CCAAGCTTCTAAGCGTAATCTGGAACATCGTATGGGTAACC<br>ACCACCCCTGTTCCGTGGTTCTCCCCTAG           |
| AMBRA1-5F               | CTCTAGATCGCGAACGCGTATGAAGGTAGTGCCTGAAAAG<br>A                                        |
| AMBRA1-HA-3R            | GCCGCCCTCGAGGAATTCCTAAGCGTAATCTGGAACATCGT<br>ATGGGTAACCACCACCCCTGTTCCGTGGTTCTCCCCTAG |
| MDA5-5F                 | CGGGATCCATGTCTGAATGGGTATTCCACA                                                       |
| MDA5-FLAG-3R            | CCGCTCGAGCTACTTATCGTCGTCATCCTTGTAATCACCAC<br>CACCATCCTCATCACTAAATAAACAGC             |
| RIG-I-5F                | CCCAAGCTTATGACCACCGAGCAACGACG                                                        |
| RIG-I-FLAG-3R           | CCGCTCGAGTCACTTATCGTCGTCATCCTTGTAATCACCAC<br>CACCTTTGGACATTTCTGCTGG                  |
| 1-173-5F (MAVS)         | CCAAGCTTATGCCGTTTGCTGAAGACAA                                                         |
| 1-173-FLAG-3R<br>(MAVS) | CCCTCGAGCTACTTATCGTCGTCATCCTTGTAATCACCACC<br>ACCTGGATTCTTGGGATGGCTCT                 |
| AMBRA1-TA clone-5F      | AAGACAACCCCCCAAGACACA                                                                |
| AMBRA1-TA clone-3R      | TGGCTAACCATCATCCGTCAAGAG                                                             |

**Table S3. Sequences of primers used in qRT-PCR.**

| <b>Genes</b>                        | <b>Sequences (5'-3')</b> |
|-------------------------------------|--------------------------|
| <i>AMBRA1</i> -5F                   | AGCTCCACGCAATGCCCGGAT    |
| <i>AMBRA1</i> -3R                   | CAGACTGTCCATCACCGATCACT  |
| <i><math>\beta</math>-actin</i> -5F | GCTCCTCCTGAGCGCAAG       |
| <i><math>\beta</math>-actin</i> -3R | CATCTGCTGGAAGGTGGACA     |
| SFV-5F                              | CCGGAGGACGCACAGAAGTTG    |
| SFV-3R                              | TGCGACGGCCACAATCGGAAG    |
